# Supplementary material for: Local delivery of sunitinib and Ce6 via redox-responsive zwitterionic hydrogels effectively prevents osteosarcoma recurrence
Source: Royal Society of Chemistry journal article supplement (doi:10.1039/d0tb00970a), 2020-01-01
Supplement: d0tb00970a1.pdf [file d0tb00970a1.pdf]

## Supplementary materials

### **Local delivery of sunitinib and Ce6 via redox-responsive zwitterionic hydrogels effectively prevents osteosarcoma recurrence**

Zhaolong Yu, †<sup>a</sup> Zecong Xiao, †<sup>b</sup>, Xintao Shuai\*<sup>b</sup> and Jiwei Tian\*<sup>a</sup>

<sup>a</sup>Department of Orthopaedics, Shanghai General Hospital, Shanghai Jiao Tong University School of Medicine, Shanghai 201620, China.

<sup>b</sup>PCFM Lab of Ministry of Education, School of Materials Science and Engineering, Sun Yat-sen University, Guangzhou 510275, China.

†These authors contributed equally to this work.

\*Corresponding authors:

Professor Jiwei Tian, E-mail: [spinetjw609@163.com](mailto:spinetjw609@163.com);

Professor Xintao Shuai, Email: [shuaixt@mail.sysu.edu.cn](mailto:shuaixt@mail.sysu.edu.cn).

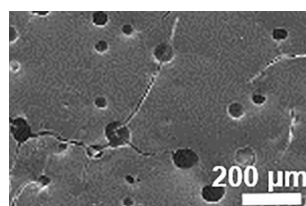

**Fig. S1** SEM image of Sun and Ce6 co-loaded DSDMA-SBMA hydrogels at 2% crosslinker.

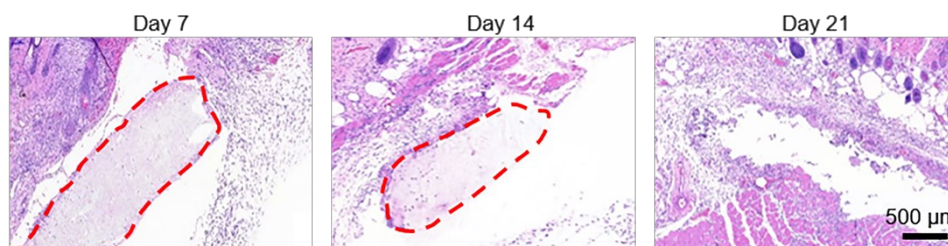

**Fig. S2** Degradation profiles of DSDMA-SBMA hydrogels with cross-linker content of 2% by mass ratio at days 7, 14, 21 after subcutaneous implantation.

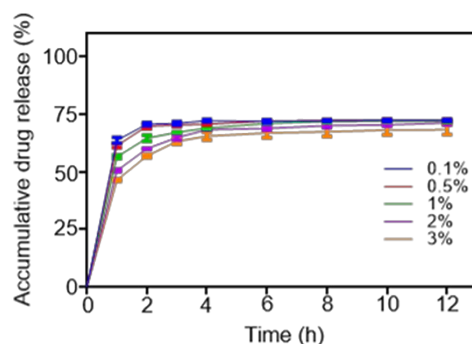

**Fig. S3** Cumulative release of Ce6 from DSDMA-SBMA hydrogels in PBS solution (n = 3; means  $\pm$  SD).

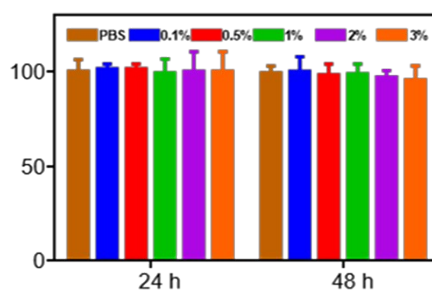

**Fig. S4** MTT assay of 143B cells cultured in media treated with DSDMA-SBMA hydrogels with cross-linker contents of 0.1, 0.5, 1, 2 and 3% by mass ratios for 24 h and 48 h (n = 3; means  $\pm$  SD).

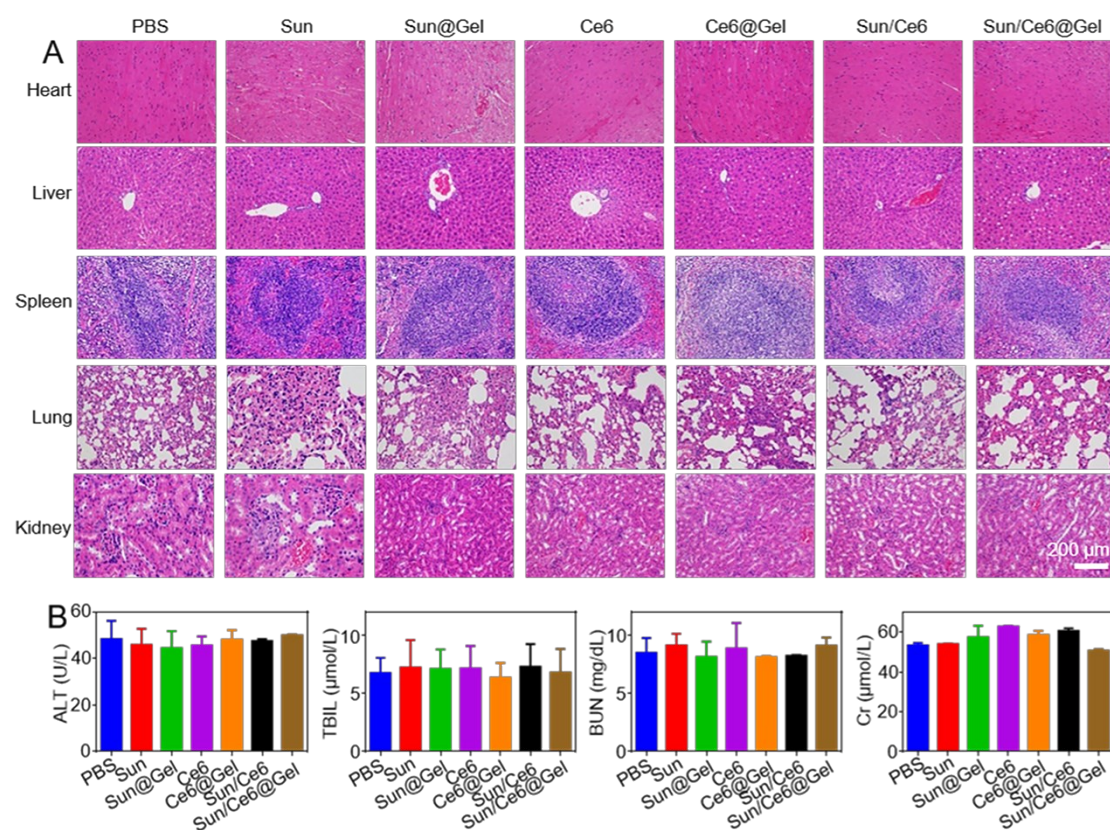

**Fig. S5** Systemic toxicity assessment of local treatment. (A) The *in vivo* toxicity to the main organs of the mice receiving free drug or drug-loaded hydrogels was evaluated by H&E staining. (B) The serum biochemistry assays showed the levels of ALT, TBIL, BUN and Cr (n = 3; means  $\pm$  SD).
